# Supplementary material for: Root biomass and nutrient potential of major crops in China
Source: Research Square preprint supplement (doi:10.21203/rs.3.rs-6470033/v1), 2025-05-06
Supplement: Supplementary file 1 [file c0ed49899478b29e77f67c0d.docx]

The determination of the root-to-straw ratio is crucial for the accuracy of root biomass estimation. Based on the review of relevant experimental published literature, the root-to-straw ratio can be estimated when the experimental data for stem, leaf, seed, root biomass, above-ground biomass, straw yield, straw-to-grain ratio, grain-to-straw ratio, and root-to-shoot ratio are known. Given this the estimation of the root-to-straw ratio was derived from equation 2.

|  |  | （2） |
| --- | --- | --- |

is the root stock ratio；is the root biomass；is the crop straw production；is the above-ground biomass and *WP* is the Crop seed production.

The grass valley and the root-crown ratio were derived from equations 3 to 4.

|  |  | （3） |
| --- | --- | --- |

is the grass valley and is the grain-to-crude ratio.

|  |  | （4） |
| --- | --- | --- |

is the root-crown ratio.

According to the principle of crop examination and with reference to the Grabs guidelines, based on reviewing and analyzing 400 experimental literatures, experimental data that seriously deviated from the normal agricultural production conditions were excluded, and finally 70 articles and 130 experimental data that conformed to the normal agricultural production conditions were screened out, and the stems, leaves, seeds, root biomass, above-ground biomass, straw yield, grass-to-grain ratio, cereal-to-grain ratio, and root-to-crown ratio of experimental data were used to calculate the corresponding root-to-straw ratio according to equations (2)-(4). The specific data are shown in Table 4, and the detailed examination process is shown appendix 1.

Table 4 Summary of root-grass ratio results of main crops

| Crop | 95% confidence interval | standard deviation | sample size | average value |
| --- | --- | --- | --- | --- |
| Maize | 0.114～0.300 | ±0.04 | 30 | 0.207 |
| Wheat | 0.144～0.320 | ±0.03 | 17 | 0.232 |
| Rice | 0.008～0.152 | ±0.01 | 20 | 0.118 |
| Soybeans | 0.193～0.251 | ±0.01 | 20 | 0.222 |
| Rapeseed | 0.064～0.167 | ±0.02 | 10 | 0.115 |
| Peanuts | 0.077～0.126 | ±0.01 | 14 | 0.102 |
| Cotton | 0.121～0.181 | ±0.01 | 16 | 0.151 |

### Appendix 1: Literature research of straw and root grass ratio of major crops

| crop | Test site | experimental scheme | root-grass ratio | literature reference |
| --- | --- | --- | --- | --- |
| Maize | Northwest A&F University | Low nitrogen | 0.265 | 1 |
| In nitrogen | 0.186 |
| Shaanxi Province | 50% -70% | 0.545 | 1,2 |
| Xinjiang |  | 0.268 |
| Xinjiang Urumqi City |  | 0.134 | 3 |
| Heilongjiang Province | No-tillage straw full coverage | 0.179 | 4 |
| No-tillage straw strip cover | 0.197 |
| Shallow turn over 15cm, straw shallow mixed back to the field | 0.25 |
| Liaoning Province | Control group experiment | 0.089 |
| Henan Province | DH605-CK | 0.211 | 5 |
| DH3-CK | 0.275 |
| North Experimental base of Shenyang Agricultural University | Artificial weeding | 0.179 | 6 |
| Artificial not weeding | 0.232 |
| Yunnan Province |  | 0.152 | 7 |
| Laiyang, Shandong | Water held in the field is 75% -85% | 0.126 | 8 |
| Field water holding is 55% -65% | 0.107 |
| Field water holding of 30% -40% | 15.63 |
| wheat | Yangling District, Shaanxi Province | Use of nitrogen, phosphorus, potassium and chemical fertilizer | 0.147 | 9 |
| Stable fertilizer and fertilizer application | 0.111 |
| Shihezi Tianye Ecological Park | Exogenous selenium spray control | 0.315 | 10 |
| Basic selenium | 0.314 |
| Xuchang, Henan | Nitrogen treatment 180 | 0.121 | 11 |
| Nitrogen treatment 240 | 0.132 |
| Nitrogen treatment 300 | 0.125 |
| Guyuan City, Ningxia | Two years of no-tillage and one year of deep loosening | 0.508 | 12 |
| Huazhong Agricultural University of Hubei Province | contrast | 0.146 | 13 |
| Selenium powder | 0.157 |
| selenite | 0.144 |
| selenate | 0.150 |
| Selenium ore | 0.150 |
| Jiangsu Province | Do not stain water treatment | 0.365 | 14 |
| Hebei Province | The soil relative humidity was 70%-75% | 0.245 | 15 |
| China Agriculture University | Fully water supply treatment | 0.087 | 16 |
| Hebei Academy of Agriculture and Forestry Sciences | Normal irrigation | 0.114 | 17 |
| 0.105 |
| 0.109 |
| 0.098 |
| 0.125 |
| Shandong Agricultural University | Suitable for moisture | 0.082 | 18 |
| 0.176 |
| University Of Science and Technology of Henan | Phosphorus | 0.107 | 19 |
| Addition of potassium | 0.089 |
| The Institute of Soil and Water Conservation, Chinese Academy of Sciences | Small root system field water holding 85% | 0.178 | 20 |
| Large root system field water holding 85% | 0.276 |
| 85% | 0.214 |
| Zoucheng Agricultural Technology Station | Fully water supply treatment | 0.338 | 21 |
| Agricultural University Of Southwest | Potassium fertilizer treatment | 0.415 | 22 |
| Rice | Xianning City, Hubei Province | In the conventional technical mode | 0.196 | 23 |
| Yangzhou, Jiangsu province |  | 0.115 | 24 |
|  | 0.125 |
|  | 0.075 |
|  | 0.082 |
| Chengdu, Sichuan Province |  | 0.083 | 25 |
| Yangzhou, Jiangsu province |  | 0.090 | 26 |
| Guangxi University | The early-season soil water content is between 80-85% | 0.109 | 27 |
| Late-season soil moisture content is between 80-85% | 0.098 |
| Heilongjiang Province | Dry and wet alternating irrigation | 0.206 | 28 |
| Hunan Province |  | 0.215 | 29 |
|  | 0.216 |
| Jiangxi Province | Do not fertilize | 0.405 | 30 |
| Hunan Province | Dry and wet alternating irrigation | 0.206 | 31 |
| Hunan Province |  | 0.151 | 32 |
| Dongtai City, Jiangsu Province | Semi-rotten solution of straw cover | 0.542 | 33 |
| Broad bean stalks covered | 0.507 |
| Chengdu | No straw cover | 0.094 | 34 |
| Wheat straw cover | 0.210 |
| Coverage of rapeseed straw | 0.234 |
| soybean | Heilongjiang Province | No biochar added | 0.156 | 35 |
| 75g / basin of black soil | 0.166 |
| 150g / basin of black soil | 0.158 |
| 300g / basin of black soil | 0.170 |
| Liaoning Province | Do not fertilize | 0.270 | 36 |
| Fertilizer amount is 300kg / hm2 | 0.158 |
| Apply carbon energy compound probiotics | 0.174 |
| Hunan Province | The application dosage of compound fertilizer was 3g / kg | 0.309 | 37 |
| Do not apply compound fertilizer | 0.179 |
| Kunming City | P0 alone, not in with mycorrhizal treatment | 0.158 | 38 |
| IOP 50 alone, inoculated with mycorrhizal treatment | 0.317 |
| IOP 50 alone, without mycorrhizal treatment | 0.257 |
| Tieling city | Nitrogen, phosphorus and potassium fertilizer | 0.365 | 39 |
| Heilongjiang Province | Do not apply nitrogen fertilizer | 0.209 | 40 |
| Conventional fertilizer for base fertilizer | 0.267 |
| Conventional fertilization + flowering period chase application of urea | 0.265 |
| Conventional fertilization + rhizobia seed mix + flowering period of chase urea | 0.224 |
| Conventional fertilization + rhizobium seed mixing + controlled release of urea at flowering period | 0.236 |
| Heilongjiang Bayi Agricultural Reclamation University | crop rotation | 0.189 | 41 |
| Three years in a row | 0.218 |
| Rapeseed | Beijing Municipality | No fertilizer is applied | 0.024 | 42 |
| Hunan Province | No fertilizer is applied | 0.024 | 43 |
| Gansu Province |  | 0.165 | 44 |
|  | 0.232 |
|  | 0.221 |
| Beijing | Conventional chemical fertilizer, do not mixed with red mud | 0.078 | 45 |
| Agricultural University Of Shenyang | The soil field water capacity was 50%, and the nitrogen fertilizer amount was 0.12 / kg | 0.072 | 46 |
| The soil field water capacity was 50%, and the nitrogen fertilizer amount was 0.24 / kg | 0.066 |
| The soil field water capacity was 60%, and the nitrogen fertilizer amount was 0.12 / kg | 0.08 |
| The soil field water capacity was 50%, and the nitrogen fertilizer amount was 0.24 / kg | 0.069 |
| cotton | Urumqi City, Xinjiang Province | Increase temperature water irrigation | 0.112 | 47 |
| Well water irrigation | 0.097 |
| Xinjiang Academy of Agricultural Reclamation Sciences | Treatment 4: C360-N450 | 0.183 | 48 |
| Treatment 5: C540-N450 | 0.207 |
| From Nanjing Agricultural University, Jiangsu Province | The level of 3.73g / strain N under normal irrigation conditions | 0.219 | 49 |
| Shanxi Agricultural University | Organic fertilizer, fertilization depth of 40-60cm | 0.118 | 50 |
| Xinjiang | N225、W3900 | 0.158 | 51 |
| N300、W3900 | 0.151 |
| Xinjiang | N138、W600 | 0.109 | 52 |
| Xinjiang | High yield cotton field | 0.161 | 53 |
| General yield cotton field | 0.150 |
| Xinjiang | N276 | 0.188 | 54 |
| N414 | 0.175 |
| Hunan | N270 | 0.146 | 53 |
| N360 | 0.141 |
| Central China Agricultural University | Under normal irrigation conditions | 0.122 | 55 |
| peanuts | Shandong |  | 0.137 | 56 |
| Shandong |  | 0.156 | 57 |
|  | 0.104 |
| Liaoning Province |  | 0.052 | 58 |
| Shandong |  | 0.11 | 59 |
|  | 0.10 |
|  | 0.09 |
| Luo He Municipal Academy of Agricultural Sciences |  | 0.117 | 60 |
| Xinjiang | Do not chase fat | 0.044 | 61 |
| Shandong |  | 0.11 | 57 |
| Liaoning Province |  | 0.04 |
| Liaoning Province | N2W2 | 0.041 | 62 |
| Anhui Province |  | 0.018 | 63 |
| Shandong |  | 0.052 | 64 |

**References:**

1. Xing, Y., Zhang, F. & Wang, X. Effects of Water Deficit Irrigation at Different Growth Stages and Nitrogen Nutrition On the Growth of Maize. *Agricultural Research in the Arid Areas*. **28**, 1-6 (2010).

2. Zhao, W., Sun, Y. & Liu, X. Effects of Drought-Rewatering-Drought On Photosynthesis and Growth of Maize. *Chinese Journal of Plant Ecology*. **40**, 594-603 (2016).

3. Ren, J. & Ge, C. Effect of Biochar On Passivation and Bioavailability of Cr (III) Pollution in Grey Desert Soil. *Chinese Agricultural Science Bulletin*. **37**, 76-80 (2021).

4. Li, N. et al. Effects of Synergistic Application of Water and Zinc Fertilizer On Physiological Characteristics and Yield of Spring Maize in Dryland. *玉米科学*. **29**, 78-82 (2021).

5. Qi, H., Yu, T. & Liu, T. Effects of Mechanical Compaction On Soil Physical Properties，Maize Growth and Yield in Farmland. *Journal of Southern Agriculture*. **52**, 951-958 (2021).

6. Wang, Z. *Effects of Ethofumesate On Growth and Physiological Biochemistry of Susceptible Self-Incompatible Lines of Maize.* [硕士]: Shenyang Agricultural University, 2020.

7. Wu, K. et al. Effects of Root Interactions On the Response of Maize and Potato to Heterogeneous Nitrogen. *Acta Ecological Sinica*. **35**, 508-516 (2015).

8. Sui, F., Ge, T., Liu, P., Lu, Y. & Zhou, G. Studies On Accumulation Translocation and Redistribution of Carbon in Summer Maize Under Drought. *Chinese Journal of Eco-Agriculture*. 234-237 (2006).

9. Liang, B., Zhao, W., Yang, X. & Zhou, J. Nitrogen Retention and Supply After Addition of N Fertilizer and its Combination with Straw in the Soils with Different Fertilities. *Scientia Agricultura Sinica*. **45**, 1750-1757 (2012).

10. Zhang, N. et al. Effect of the Selenium Fertilizer in Drip Irrigation Onwheat Yield and Selenium Content. *Journal of Triticeae Crops*. **35**, 995-1001 (2015).

11. Wang, L. et al. Effect of Nitrogen Application On Yield,Nitrogen Accumulation and Use Efficiency in Root-Shoot of Winter Wheat. *Journal of Triticeae Crops*. **41**, 1403-1408 (2021).

12. Hou, X., Li, R., Jia, Z. & Han, Q. Effects of Different Tillage Practices On Soil Properties and Wheat Yields in Dry Farmland of Northwest China. *Journal of Plant Nutrition and Fertilizer*. **23**, 1146-1157 (2017).

13. Li, M. et al. Effects of Different Selenium Sources On Wheat Growth, Selenium Uptake and Utilization and the Aftereffects On Maize. *Journal of Agro-Environment Science*. **36**, 1-7 (2017).

14. Ding, J. et al. Effect of Waterlogging at Elongation Or After Anthesis On Grain Yield Anaccumulation and Remobilization of Dry Matter and Nitrogen in Wheat. *Journal of Triticeae Crops*. **37**, 1473-1479 (2017).

15. Liu, C. et al. Effect of Available Soil Water at Planting On Growth of Root, Canopy Andsoil Water Use of Winter Wheat in Field. *Jouranl of Natural Disasters*. 149-154 (2003).

16. Yang, G., Luo, Y., Li, B. & Liu, X. Effect of Different Soil Water Conditions On Growth of Root and Shoot of Winter Wheat. *Agricultural Research in the Arid Areas*. 104-109 (2003).

17. Guan, J., Ma, C. & Li, G. The Change of Biomass of the Root and Shoot Under Droughtstress and its Relation with Drought－Resistance in Wheat. *Journal of Agricultural Univereity of HeBei*. 1-5 (2004).

18. Feng, H., Tan, X. & Bi, J. Study On the Ｒoot Distribution and Ｒoot Characteristics of Winter Wheat Under Different Soil and Water Conditions. *Journal of Anhui Agri*. **41**, 13465-13467 (2013).

19. Zhang, J., Wang, H., Shen, P., Dong, Z. & Li, Y. Effects of Different Phosphorus， Potassium Fertilizer Combined Application On Morphology and Physiological Activity of Winter Wheat Root. *Hubei Agricultural Sciences*. **54**, 1312-1316 (2015).

20. Ma, S., Xu, B., Wang, H., Yang, S. & Li, F. Effect of Root Redundancy On Grain Yield and Water Use Efficiency of Winter Wheat. *Chin J Appl Environ Bio*. **16**, 305-308 (2010).

21. Shi, H., Wang, F., Wang, Z. & Dang, W. Studies On the Effect of Inter-Annual Temperature Variations On the Root System of Wheat. *Anhui Agronomy Bulletin*. **17**, 29-31 (2011).

22. Xiong, M. et al. Effect of Potash Fertilisation On the Nutritional Ecology of Winter Wheat Roots. *Acta Pedologica Sinica*. 285-291 (2004).

23. Yang, K. et al. Effect of Cold Waterlogged Field Improvement On Root Growth and Yield of Rice. *Hubei Agricultural Sciences*. **60**, 17-19 (2021).

24. Huang, L. et al. Interactive Effects of Light Intensity and Nitrogen Supply On Dry MatterProduction and Distribution of Rice. *China Rice Sci*. **28**, 167-176 (2014).

25. Peng, Y. et al. Effects of Slow / Controlled Release Fertilizers On Root Morphological and Physiological Characteristics of Rice. *Journal of Plant Nutrition and Fertilizer*. **19**, 1048-1057 (2013).

26. Gong, J. et al. Difference of Root Morphological and Several Physiological Characteristics Between Indica and Japonica Super Rice Varieties. *作物学报*. **40**, 1066-1080 (2014).

27. Yang, C. et al. Effects of Soil Moisture On Root Growth of No-Tillage Rice. *Journal of Huazhong Agricultural Uniyersity*. **35**, 8-16 (2016).

28. Li, H. et al. Influence of Nitrogen Levels On Morphological and Physiological Characteristicsof Root System in Japonica Rice in Northeast China. *China Rice Sci*. **26**, 723-730 (2012).

29. Shi, L. et al. Effects of Different Long Term Fertilizer Management Onphysiological Characteristic of Root and Yield of Ricein Double Cropping Rice Paddy Field. *Journal of China Agricultural University*. **26**, 18-29 (2021).

30. Li, W., Yan, X., Liu, Y., Feng, B. & Zhao, J. Effect of Long-Term Unbalanced Fertiliser Application On Soil Fertility and Rice Biomass in Rice Soils. *Agriculture and Technology*. **41**, 78-80 (2021).

31. Li, H. et al. Irrigation and Phosphorus Fertilization Combine to Affect Uptake and Utilizationof Phosphorus by Rice. *Journal of Irrigation and Drainage*. **40**, 45-52 (2021).

32. Tang, H. et al. Effects of Different Cultivation Methods On Growth Stage, Dry Matter Accumulation, and Yield of Early Rice in Double Cropping Rice Field. *Acta Agronomica Sinica*. **40**, 711-718 (2014).

33. Shi, Y., Song, J., Shen, Q., Xu, G. & Li, W. Biological Effect of Mulching On Upland Rice and Characteristics of N Absorption of Mulched Rice. *Rural Eco-Environment*. 22-25 (2001).

34. Yan, F. et al. Effects of Straw Mulch and Nitrogen Management On Root Growth and Nitrogen Utilization Characteristics of Hybrid Rice. *Journal of Plant Nutrition and Fertilizer*. **21**, 23-35 (2015).

35. Ding, J., Yu, S., Li, X. & Lai, Y. Effects of Biochar Application On Soybean Physiological Indices and Agronomic Traits. *Jiangsu J.of Agr.Sci.* **35**, 784-789 (2019).

36. Sun, X. & Wang, W. Comparison of Root Trait of Soybean Liaodou 15 Under Different Fertilizer Conditions. *Horticulture & Seed*. **41**, 65-67 (2021).

37. Liu, J., Long, Y. & Li, X. Effects of Compound Fertilizer Application On Soybean Growth and Soil Enzyme Activities. *Anhui Agri,Sci,Bull*. **28**, 95-98 (2022).

38. Fu, X. et al. Effect of AMF Inoculation On Plant Growth and P Utilization of Intercropped Soybeans Under P Addition to Chamber On Ｒed Soil. *Southwest China Journal of Agricultural Sciences*. **30**, 2526-2532 (2017).

39. Zhu, H. Effect of Additional Application of Rhizobial Fertiliser and Foliar Liquid Fertiliser On Growth, Development and Yield of Soybean Under Reduced Nitrogen Conditions. *江苏农业科学*. **50**, 60-65 (2022).

40. Zhou, C. et al. Study On High Efficient Fertilization Methods of Coupling Effect of Ｒhizobiumand Nitrogen Fertilizer in Wind Sand and Semi-Arid Area of Heilongjiang Province. *Soybean Science*. **39**, 912-918 (2020).

41. Zheng, G., Li, G., Zhang, H. & Wang, J. Studies On the Causes of Increased Root-Crown Ratio in Continuous Cropped Soybeans. *耕作与栽培*. 17-19 (1997).

42. Li, B. Effect of Amino Acid Organic Nitrogen Fertilisers with Different Rates of Application On the Growth of Oilseed Rape. *Agricultural Science and Technology Newsletter*. 153-155 (2020).

43. Yang, Y. et al. Effects of Different NPK Ratios On the Growth and Yield of Winter Rapeseed. *Acta Agriculturae Boreali-Occidentalis Sinica*. **20**, 70-75 (2011).

44. Zeng, X. et al. Comparison of Growth Characteristics of Wintercomparison of Growth Characteristics of Winter Turnip Rapeturnip Brassica Rapa L.）After Returning Greenafter Returning Green. *Journal of Hesse College*. **36**, 67-74 (2020).

45. Li, P., Peng, X., Luan, Z., Zhang, C. & Zhao, T. Effect of Adding Solid Waste Red Mud On Growth and Quality of Oilseed Rape Under Over-Fertilisation. *Solid Waste Treatment and Disposal*. **32**, 97-101 (2014).

46. Zhao, G., Yu, N., Liu, Q., Wei, Z. & Zhang, Y. Study On the Effect of Water-Nitrogen Co-Ordination On Oilseed Rape Biomass. *Ｃhinese Journal of Soil Science*. 2298-2302 (2006).

47. Meng, A. et al. Effects of Warming Irrigation On Biomass，Nutrient Uptake and Yield of Cotton. *Xinjiang Agricultural Sciences*. **59**, 558-566 (2022).

48. Liu, Y., Yin, F., Gao, Z., Chen, Y. & Lv, N. Effects of Increasing Atmospheric CO2 Concentration On the Growth and Development of Drip-Irrigated Cotton in Xinjiang Oasis. *Jiangsu Agricultural Science*. **44**, 108-110 (2016).

49. Guo, W., Zhao, X., Chen, B., Liu, R. & Zhou, Z. Effects of Nitrogen On Cotton (Gossypium Hirsutum L.) Root Growth Undershort-Term Waterlogging During Flowering and Boll-Forming Stage. *Acta, Agronomica Sinica*. **35**, 1078-1085 (2009).

50. Su, Z. et al. Effects of Deep Application of Fertilizer in Current Year On Root-Shoot-SoilSystem Formation of Cotton in the Immature Loess Soil. *J. Soil Water Conserv.* **30**, 218-224 (2016).

51. Deng, Z. et al. Effects of Water and Nitrogen Regulation On Root and Shoot Growth Characteristics and Yield of Cotton in Arid Area. *Soil and Fertiliser China*. 57-64 (2015).

52. Xie, Z. & Tian, C. Effects of Water and Nitrogen On Root Morphological Characteristics and Biomassdistribution Under Film Drip Irrigation. *Journal of Arid Land Resources and Environment*. **24**, 138-143 (2010).

53. Zhang, H., Luo, H., Li, L., Zhang, Y. & Zhang, W. Characteristics of Root and Shoot Biomass Accumulation in High-Yield Cotton Fields with Mulch-Drip Irrigation. *Cotton Science*. **27**, 427-434 (2015).

54. Xie, Z., Tian, C., Bian, W. & Zeng, F. Effect of Nitrogen Application On Root Distribution and Nutrient Uptake in Cotton Seedlings. *Arid Zone Research*. **27**, 374-379 (2010).

55. Zhou, H., Peng, L., Yuan, B., Zhang, X. & Liu, Y. Effects of Irrigation Norm On Dry Matter Accumulation Andpartition of Potted Cotton. *Journal of Lrrigation and Drainage*. **31**, 64-67 (2012).

56. Xu, T., Shi, C., Zhang, Y., Ding, H. & Zhang, Z. Relationship Among Root Traits , Biomass, Harvest Index and Economic Yield in Peanut. *Journal of Peanut Science*. **47**, 63-67 (2018).

57. Ding, H. et al. Effects of Drought Stress On Root Growth Characteristics of Peanut Duringmid-to-Late Growth Stages. *Chinese Journal of Eco-Agricultur*. **21**, 1477-1483 (2013).

58. Xia, G. et al. Effect of Biochar-Based Fertilizer and Regulated Deficit Irrigation Onroot Shoot Ratio and Water Use Efficiency of Peanut. *Journal of Shenyang Agricultural University*. **49**, 315-321 (2018).

59. Qu, J. Effect of Drought Stress On Root-Crown Ratio and Yield and Quality of Different Types of Peanuts. *Agricultural Science and Technology Newsletter*. 129-132 (2014).

60. Zhou, Y. et al. Effect of Shading On the Agronomic Characteristicsand Yield of Peanut. *Crop Ｒesearch*. **35**, 214-217 (2021).

61. Liu, X. et al. Effect of Drip Irrigation and Fertilizer Coupling On Peanut( Arachis Hypogaea L. ) Dry Matter Accumulation and its Yield. *Xinjiang Agricultural Sciences*. **54**, 2013-2021 (2017).

62. Liao, C. et al. Effects of Irrigation and Nitrogen On Growth and Yield of Peanut in Micro- Irrigation System. *Chinese Journal of Oil Crop Sciences*. **39**, 372-379 (2017).

63. Ni, W., Yu, H., Jiang, J., Guan, S. & Ji, F. Studies On the Effect of Applying Uniconazole to Peanut On Yield and Quality. *Chinese Agricultural Science Bulletin*. **30**, 223-228 (2014).

64. Gao, R. et al. Effects of Salt and Drought Cross Stress On Peanut( Arachis Hypogaea) Growth and Physiological Characteristics. *Chinese Journal of Oil Crop Sciences*. **40**, 218-226 (2018).
